# Supplementary material
Source: PubMed Central journal article supplement (PMC2903002)
Supplement: NIHMS148538-supplement-tbl_1.pdf [file NIHMS148538-supplement-tbl_1.pdf]

## Supplementary Table 1: 14q13.3 amplicon-associated gains/losses

| <u>Cytoband<sup>a</sup></u> | <u>Gain/loss</u> | <u>Selected resident cancer genes</u> |
|-----------------------------|------------------|---------------------------------------|
| 1q21.1                      | gain             |                                       |
| 1q21.2                      | gain             |                                       |
| 1q21.3                      | gain             |                                       |
| 2p23.2                      | gain             |                                       |
| 2p23.1                      | gain             |                                       |
| 5p15.33                     | gain             | <i>TERT</i>                           |
| 5p15.32                     | gain             |                                       |
| 5p15.31                     | gain             |                                       |
| 5p15.2                      | gain             |                                       |
| 5p15.1                      | gain             |                                       |
| 8p23.3                      | loss             |                                       |
| 8p23.2                      | loss             |                                       |
| 8p23.1                      | loss             |                                       |
| 8p22                        | loss             |                                       |
| 14q11.2                     | gain             |                                       |
| 14q12                       | gain             |                                       |
| 14q13.1                     | gain             |                                       |
| 14q13.2                     | gain             |                                       |
| 14q13.3                     | gain             | <i>TTF1</i>                           |
| 14q21.1                     | gain             |                                       |
| 14q21.2                     | gain             |                                       |
| 14q21.3                     | gain             |                                       |
| 14q22.1                     | gain             |                                       |
| 14q22.2                     | gain             |                                       |
| 16p13.13                    | gain             |                                       |
| 17q23.2                     | gain             | <i>RPS6KB1, PPM1D</i>                 |

<sup>a</sup>To detect associations between DNA copy number alterations at distinct loci, a Pearson's correlation was computed between the mean copy number of a given cytoband and that of all other cytobands. Statistically significant correlations were determined by randomly permuting cytoband labels and recalculating correlations 100 times; a false discovery rate (FDR) of 1% was used to establish a significance threshold. Positive associations with 14q13.3 (*TTF1*) are shown. Note, positive associations elsewhere on 14q reflect DNA segments co-amplified with 14q13.3.
