# Supplementary material
Source: PubMed Central journal article supplement (PMC2903002)
Supplement: NIHMS148538-supplement-tbl_2.pdf [file NIHMS148538-supplement-tbl_2.pdf]

## Supplementary Table 2: Expression of 14q13.3 amplicon genes

| <u>Gene</u>         | <u>Tumorigenic vs. immortalized non-tumorigenic<sup>a</sup></u> | <u>Gain vs. no gain<sup>a</sup></u> |
|---------------------|-----------------------------------------------------------------|-------------------------------------|
| NFKBIA              | $P=0.62$                                                        | $P=0.045$                           |
| INSM2 <sup>b</sup>  | Indeterminate                                                   | Indeterminate                       |
| GARNL1              | $P=0.93$                                                        | $P<0.01$                            |
| BRMS1L              | $P=0.71$                                                        | $P<0.01$                            |
| MBIP                | $P=0.87$                                                        | $P<0.01$                            |
| TITF                | $P=0.04$                                                        | $P=0.046$                           |
| NKX2-8 <sup>b</sup> | Indeterminate                                                   | Indeterminate                       |
| PAX9                | Indeterminate <sup>c</sup>                                      | $P=0.41$                            |

<sup>a</sup>Mann-Whitney U-Test

<sup>b</sup>Not well-measured by microarray

<sup>c</sup>Insufficient samples with well-measured expression
