# Supplementary material
Source: PubMed Central journal article supplement (PMC2903002)
Supplement: NIHMS148538-supplement-tbl_3.pdf [file NIHMS148538-supplement-tbl_3.pdf]

**Supplementary Table 3: Specimens profiled**

| <u>Cell line</u> | <u>Comments/Parental histology</u> | <u>Lung tumors</u> | <u>Histology</u>        |
|------------------|------------------------------------|--------------------|-------------------------|
| SAEC             | primary cells                      | L68                | Adenocarcinoma          |
| HBEC3-UI         | primary cells                      | L69                | Adenocarcinoma          |
| HBEC5-UI         | primary cells                      | L80                | Adenocarcinoma          |
| HBEC2-KT         | immortalized, non-tumorigenic      | L157               | Adenocarcinoma          |
| HBEC3-KT         | immortalized, non-tumorigenic      | L132               | Adenocarcinoma          |
| HBEC4-KT         | immortalized, non-tumorigenic      | L137               | Adenocarcinoma          |
| HBEC5-KT         | immortalized, non-tumorigenic      | L143               | Adenocarcinoma          |
| HBEC2-E          | immortalized, non-tumorigenic      | L147               | Adenocarcinoma          |
| BEAS-2B          | immortalized, non-tumorigenic      | L156               | Adenocarcinoma          |
| A549             | Adenocarcinoma                     | L161               | Adenocarcinoma          |
| CaLu-1           | NSCLC, not-specified               | L165               | Adenocarcinoma          |
| CaLu-3           | Adenocarcinoma                     | L178               | Adenocarcinoma          |
| CaLu-6           | NSCLC, not-specified               | L180               | Adenocarcinoma          |
| NCI-H23          | Adenocarcinoma                     | L181               | Adenocarcinoma          |
| NCI-H157         | Squamous cell carcinoma            | L185               | Adenocarcinoma          |
| NCI-H322         | Bronchoalveolar                    | L187               | Adenocarcinoma          |
| NCI-H358         | Bronchoalveolar                    | L191               | Adenocarcinoma          |
| NCI-H441         | Adenocarcinoma                     | L198               | Adenocarcinoma          |
| NCI-H460         | Large cell                         | L199               | Adenocarcinoma          |
| NCI-H661         | Large cell                         | L204               | Adenocarcinoma          |
| NCI-H1155        | Large cell                         | L213               | Adenocarcinoma          |
| NCI-H1299        | Large cell                         | L218               | Adenocarcinoma          |
| NCI-H1355        | Adenocarcinoma                     | L222               | Adenocarcinoma          |
| NCI-H1395        | Adenocarcinoma                     | L223               | Adenocarcinoma          |
| NCI-H1437        | Adenocarcinoma                     | L226               | Adenocarcinoma          |
| NCI-H1648        | Adenocarcinoma                     | L234               | Adenocarcinoma          |
| NCI-H1650        | Bronchoalveolar                    | L237               | Adenocarcinoma          |
| NCI-H1666        | Bronchoalveolar                    | L238               | Adenocarcinoma          |
| NCI-H1770        | Neuroendocrine                     | L257               | Adenocarcinoma          |
| NCI-H1781        | Bronchoalveolar                    | L265               | Adenocarcinoma          |
| NCI-H1792        | Adenocarcinoma                     | L285               | Adenocarcinoma          |
| NCI-H1819        | Adenocarcinoma                     | L299               | Adenocarcinoma          |
| NCI-H1975        | Adenocarcinoma                     | L306               | Adenocarcinoma          |
| NCI-H2009        | Adenocarcinoma                     | L313 met           | Adenocarcinoma          |
| NCI-H2073        | Adenocarcinoma                     | L319 met           | Adenocarcinoma          |
| NCI-H2087        | Adenocarcinoma                     | L320               | Adenocarcinoma          |
| NCI-H2122        | Adenocarcinoma                     | L41                | Squamous cell carcinoma |
| NCI-H2126        | Large cell                         | L42                | Squamous cell carcinoma |
| NCI-H2347        | Adenocarcinoma                     | L44                | Squamous cell carcinoma |
| NCI-H2882        | NSCLC, not-specified               | L46                | Squamous cell carcinoma |
| NCI-H2887        | NSCLC, not-specified               | L49                | Squamous cell carcinoma |
| NCI-H3122        | NSCLC, not-specified               | L50                | Squamous cell carcinoma |
| NCI-H3255        | Adenocarcinoma                     | L52                | Squamous cell carcinoma |
| HCC15            | Squamous cell carcinoma            | L53                | Squamous cell carcinoma |
| HCC44            | Adenocarcinoma                     | L54                | Squamous cell carcinoma |
| HCC78            | Adenocarcinoma                     | L55                | Squamous cell carcinoma |
| HCC95            | Squamous cell carcinoma            | L56                | Squamous cell carcinoma |
| HCC193           | Adenocarcinoma                     | L60                | Squamous cell carcinoma |
| HCC366           | Adeno-Squamous                     | L139               | Squamous cell carcinoma |
| HCC461           | Adenocarcinoma                     | L140               | Squamous cell carcinoma |
| HCC515           | Adenocarcinoma                     | L167               | Squamous cell carcinoma |
| HCC827           | Adenocarcinoma                     | L170               | Squamous cell carcinoma |
| HCC1171          | NSCLC, not-specified               | L172               | Squamous cell carcinoma |
| HCC1195          | Adenocarcinoma                     | L173               | Squamous cell carcinoma |
| HCC1359          | Large cell                         | L174               | Squamous cell carcinoma |
| HCC1833          | Adenocarcinoma                     | L183               | Squamous cell carcinoma |
| HCC2279          | Adenocarcinoma                     | L193               | Squamous cell carcinoma |
| HCC2429          | NSCLC, not-specified               | L195               | Squamous cell carcinoma |
| HCC2450          | Squamous cell carcinoma            | L201               | Squamous cell carcinoma |
| HCC2935          | NSCLC, not-specified               | L203               | Squamous cell carcinoma |
| HCC4006          | Adenocarcinoma                     | L209               | Squamous cell carcinoma |
|                  |                                    | L210               | Squamous cell carcinoma |
|                  |                                    | L214               | Squamous cell carcinoma |
|                  |                                    | L217               | Squamous cell carcinoma |
|                  |                                    | L219               | Squamous cell carcinoma |
|                  |                                    | L220 met           | Squamous cell carcinoma |
|                  |                                    | L235               | Squamous cell carcinoma |
|                  |                                    | L245               | Squamous cell carcinoma |
|                  |                                    | L246               | Squamous cell carcinoma |
|                  |                                    | L247               | Squamous cell carcinoma |
|                  |                                    | L288               | Squamous cell carcinoma |
|                  |                                    | L316               | Squamous cell carcinoma |
|                  |                                    | L323               | Squamous cell carcinoma |
|                  |                                    | L333               | Squamous cell carcinoma |
|                  |                                    | LC-NA1             | Squamous cell carcinoma |
|                  |                                    | LC-NA3             | Squamous cell carcinoma |
