# Supplementary material
Source: PubMed Central journal article supplement (PMC2903002)
Supplement: NIHMS148538-supplement-tbl_4.pdf [file NIHMS148538-supplement-tbl_4.pdf]

#### Supplementary Table 4: siRNA sequences targeting TITF1

SENSE: 5'-CCAAAGCACACGACUCCGUUU-3'  
ANTISENSE: 5'-ACGGAGUCGUGUGCUUUGGUU-3'

SENSE: 5'-CAAGAAAGUGGGCAUGGAGUU-3'  
ANTISENSE: 5'-CUCCAUGCCCACUUUCUUGUU-3'

SENSE: 5'-GACGUGAGCAAGAACAUGGUU-3'  
ANTISENSE: 5'-CCAUGUUCUUGCUCACGUCUU-3'

SENSE: 5'-CACCUGAACUCCUCGGGCUUU-3'  
ANTISENSE: 5'-AGCCCGAGGAGUUCAGGUGUU-3'
